# Supplementary material
Source: PubMed Central journal article supplement (PMC1525011)
Supplement: bj3980113add.pdf [file bj3980113add.pdf]

**Supplement 1 Absorption maxima and extinction coefficients of some cytokinins and cytokinin-derived aldehydes**

Absorption spectra were measured in 75 mM imidazole/HCl buffer, pH 6.5 and in 50 mM Tris/HCl buffer, pH 8.0. 3-Methyl-2-butenal, furfural and 4-hydroxybenzaldehyde are the products of enzymatic degradation of isopentenyladenine, kinetin and *p*-topolin, respectively.

| Compound              | pH 6.5                |                                | pH 8.0                |                                |
|-----------------------|-----------------------|--------------------------------|-----------------------|--------------------------------|
|                       | $\lambda_{\max}$ (nm) | $\epsilon$ ( $M^{-1}cm^{-1}$ ) | $\lambda_{\max}$ (nm) | $\epsilon$ ( $M^{-1}cm^{-1}$ ) |
| Isopentenyladenine    | 269.5                 | 18200                          | 269.0                 | 17800                          |
|                       |                       |                                | 223.5                 | 32700                          |
| <i>p</i> -Topolin     | 269.5                 | 19300                          | 269.5                 | 19700                          |
|                       |                       |                                | 224.5                 | 34000                          |
| 3-Methyl-2-butenal    | 241.0                 | 12400                          | 241.0                 | 12400                          |
|                       |                       |                                | 219.0                 | 33100                          |
|                       |                       |                                | 219.0                 | 32200                          |
| Furfural              | 277.0                 | 15000                          | 277.0                 | 14500                          |
|                       |                       |                                | 218.5                 | 30200                          |
| 4-Hydroxybenzaldehyde | 327.0                 | 2800                           | 330.0                 | 17900                          |
|                       | 284.0                 | 13900                          | 293.0                 | 7800                           |
|                       |                       |                                | 219.0                 | 31700                          |

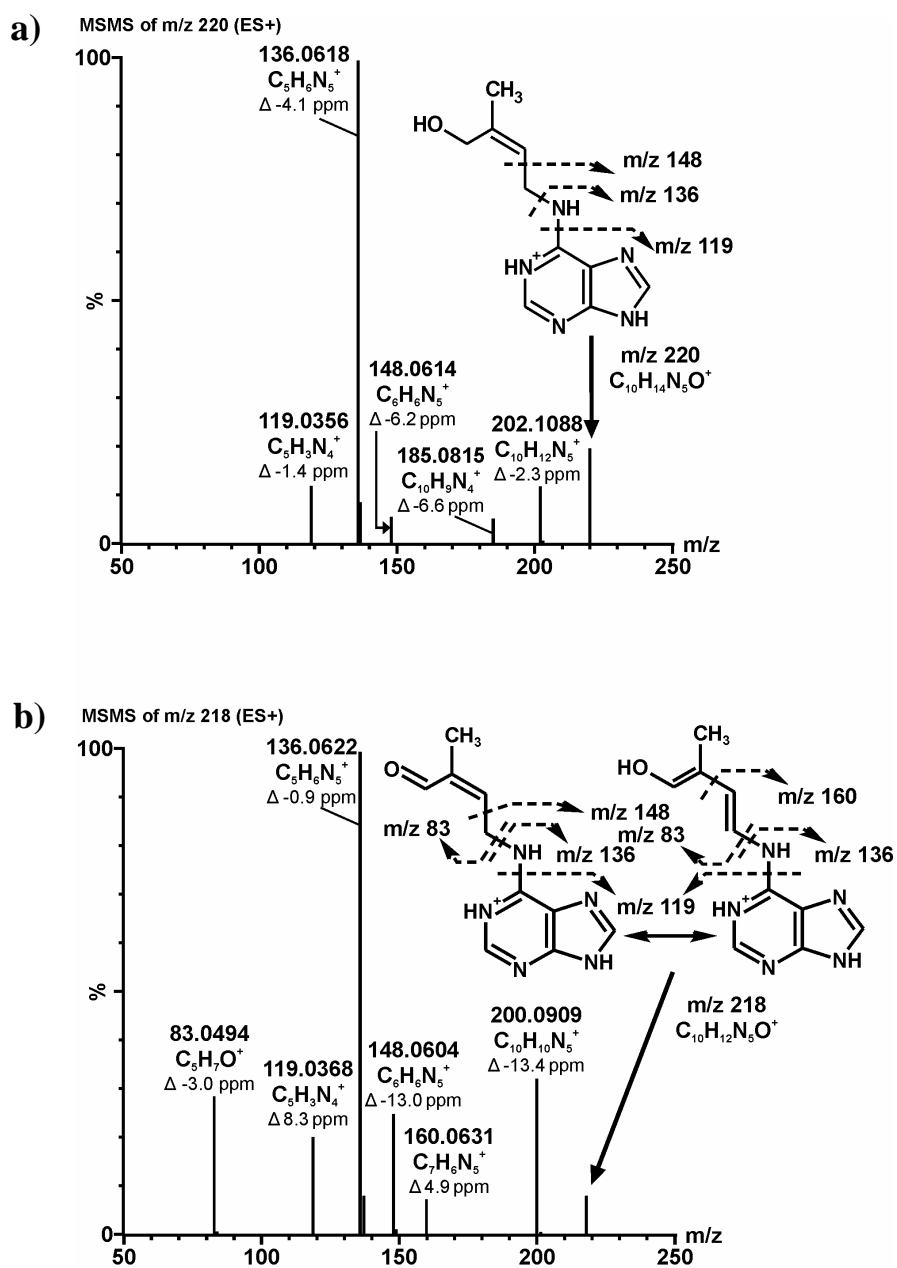

**Supplement 2 MS/MS analysis of ZmCKX1 (1.5  $\mu$ M) reaction with cytokinins: (a) *trans*-zeatin (50  $\mu$ M), (b) *trans*-zeatin[-2H] intermediate.**

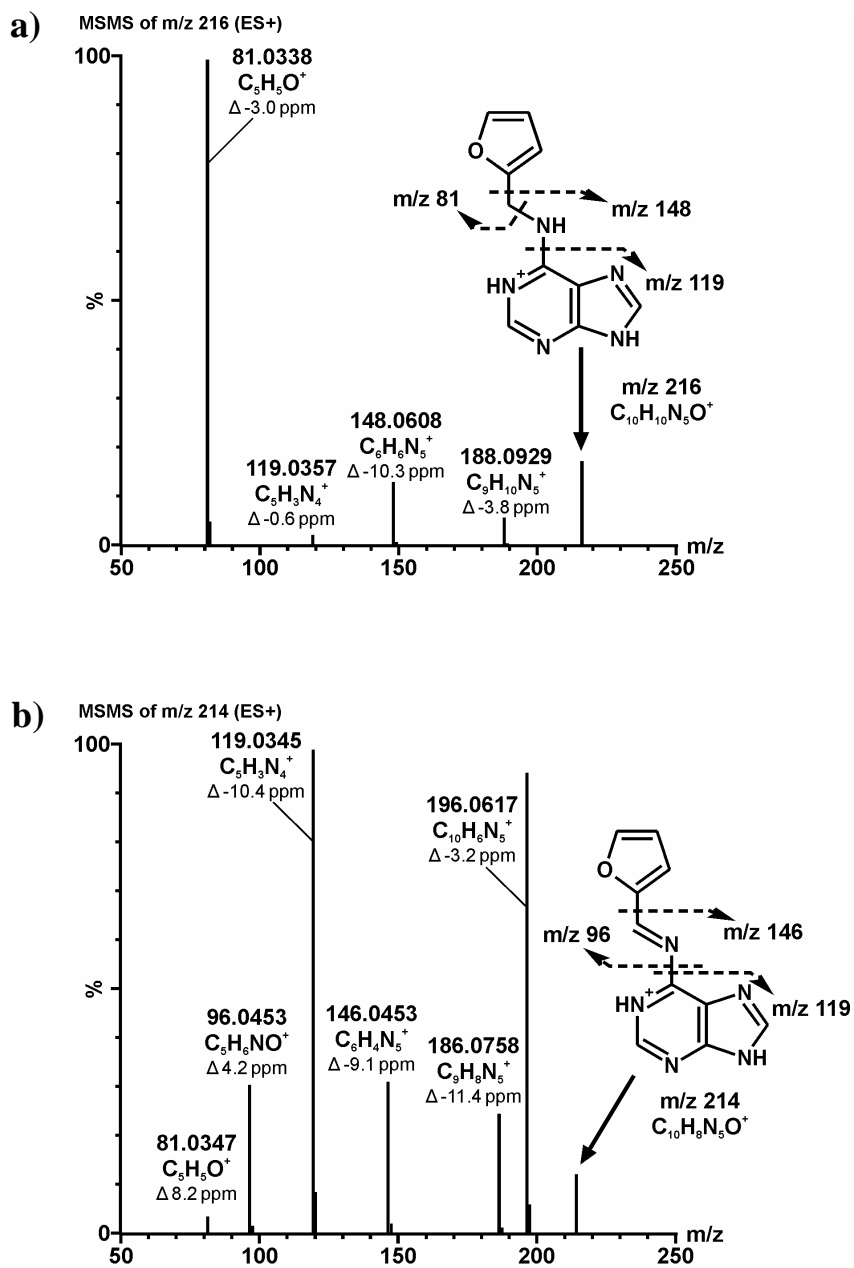

**Supplement 3 MS/MS analysis of ZmCKX1 (1.5 μM) reaction with cytokinins: (a) kinetin (50 μM), (b) kinetin[-2H] intermediate.**

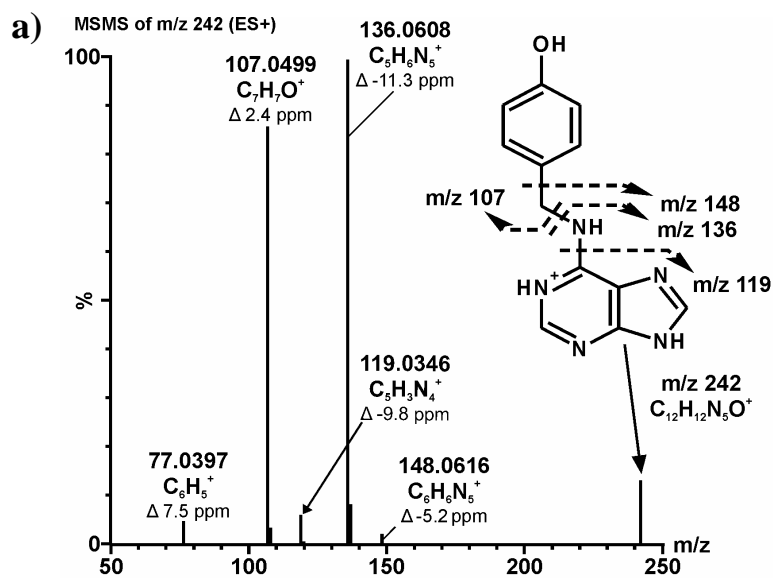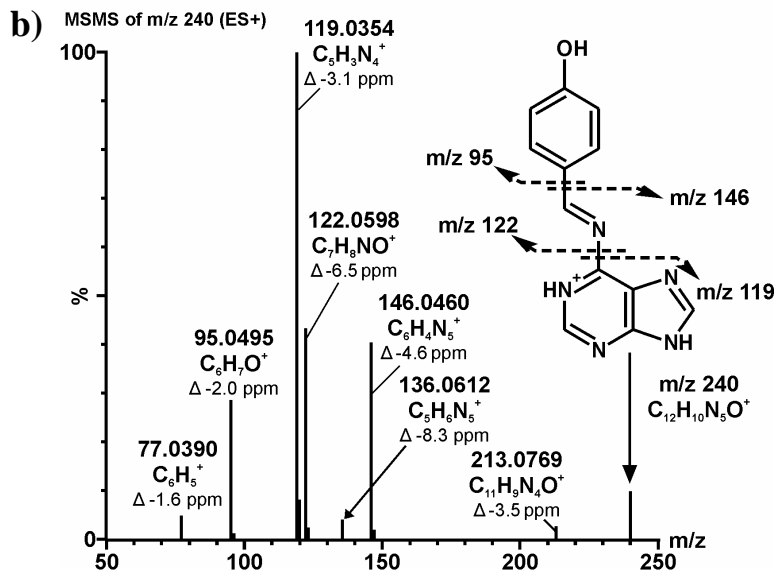

**Supplement 4 MS/MS analysis of ZmCKX1 (1.5  $\mu$ M) reaction with cytokinins: (a) *p*-topolin (50  $\mu$ M), and (b) *p*-topolin[-2H] intermediate.**
